# Supplementary material for: Synthesis of PVC/CNT nanocomposite fibers using a simple deposition technique for the application of Alizarin Red S (ARS) removal
Source: Royal Society of Chemistry journal article supplement (doi:10.1039/c4ra16043f), 2015-01-01
Supplement: c4ra16043f1.pdf [file c4ra16043f1.pdf]

## Electronic Supplementary Information

### Synthesis of PVC/CNT nanocomposite Fibers using simple deposition technique for the application of Alizarin Red S (ARS) removal

Mudassir Mudassir Hasan<sup>a</sup>, Rajeev Kumar<sup>b\*</sup>, Moonyong Lee<sup>a\*</sup>, M.A. Barakat<sup>bc</sup>

<sup>a</sup>*School of Chemical Engineering, Yeungnam University, Gyeongsan 712-749, Republic of Korea.*

<sup>b</sup>*School of Chemical Engineering King Abdul Azeez University Saudi Arabia.*

\*E-mail: [mynlee@ynu.ac.kr](mailto:mynlee@ynu.ac.kr), Phone: 82-53-810-2512

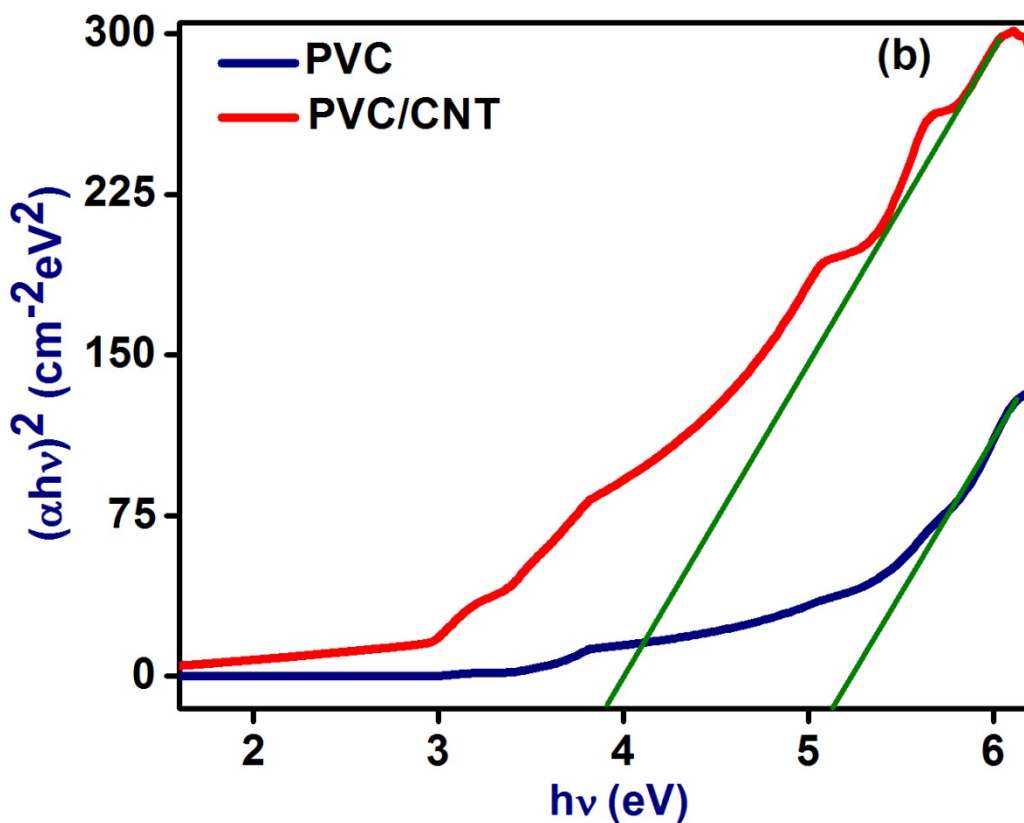

Fig. S1. Direct band gap plot for PVC and PVC/CNT nanocomposite fibers

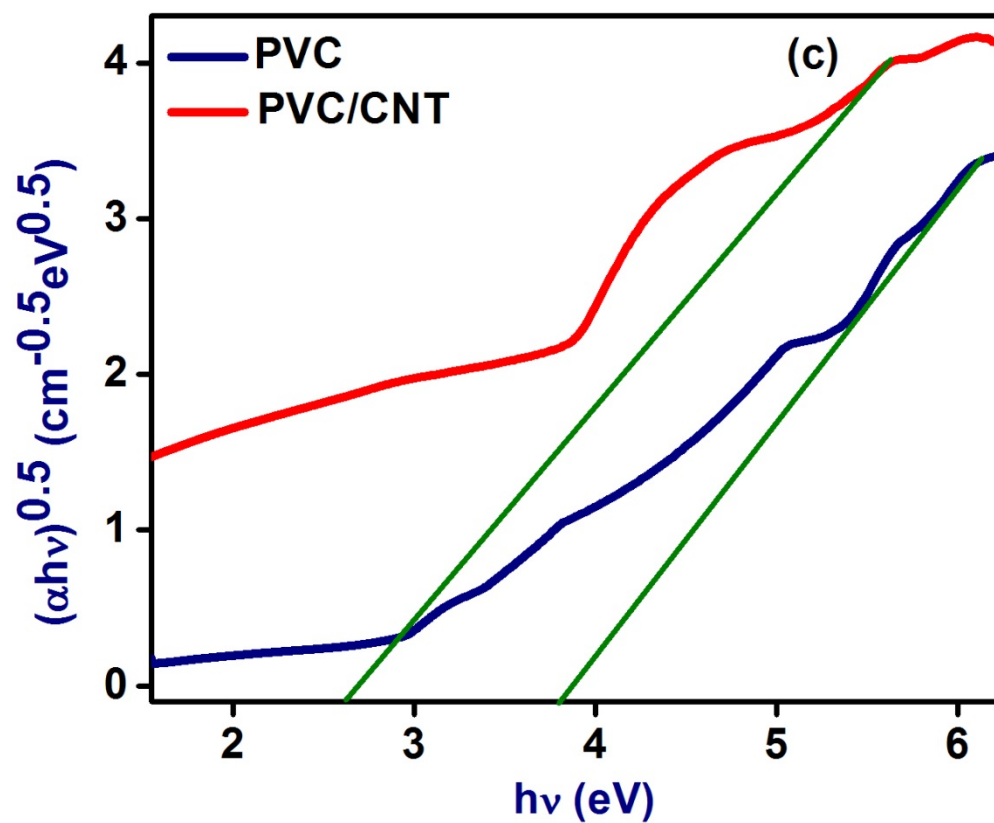

Fig. S2 Indirect band gap plot for PVC and PVC/CNT nanocomposite fibers

Table S1. Preparation detail for PVC and PVC/CNT nanocomposite fibers

| Sample ID | PVC (g) | CNT(g) | THF (mL) |
|-----------|---------|--------|----------|
| PVC       | 1.5     | 0      | 50       |
| PVC/CNT   | 1.5     | 0.045  | 50       |

**Table S2.** Band gap according to the direct allowed and indirect allowed transitions.

| Sample  | Direct allowed $E_g$ (eV) | Indirect allowed $E_g$ (eV) |
|---------|---------------------------|-----------------------------|
| PVC     | 5.13                      | 3.81                        |
| PVC/CNT | 3.89                      | 2.62                        |

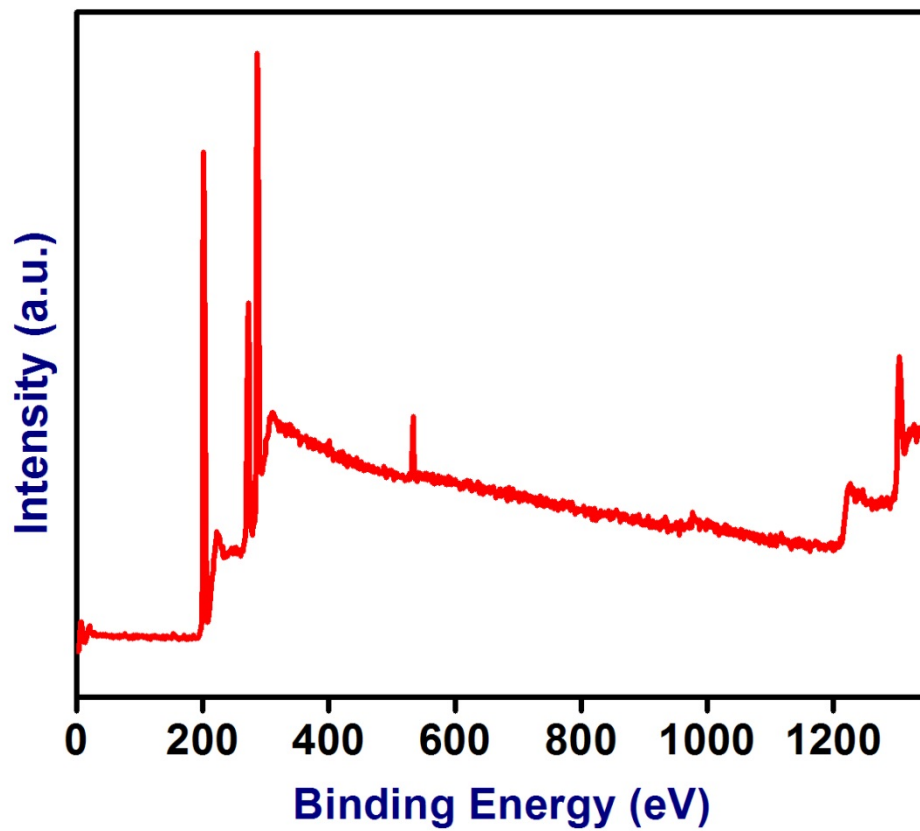

Fig. S3 XPS survey scan for PVC/CNT nanocomposite fibers.
